# Supplementary material
Source: HighWire-hosted journal article supplement (https://bmjopen.bmj.com/content/11/3/e039238)
Supplement: inline-supplementary-material-1 [file inline-supplementary-material-1.pdf]

*Appendix 1: Following diagnoses- and procedure codes were used to identify patients undergoing hip fracture surgery.*

| <b>ICD-10 code</b>                  | <b>Diagnosis code</b>         |
|-------------------------------------|-------------------------------|
| <i>Fracture of the femoral neck</i> | DS720                         |
| <i>Per-trochanter fracture</i>      | DS721                         |
| <i>Sub-trochanter fracture</i>      | DS722                         |
|                                     | <b>Surgery procedure code</b> |
| <i>Osteosynthesis</i>               | KNFJ4-9                       |
| <i>Primary hip replacement</i>      | KNFB0-99                      |

ICD-10: WHO's International Statistical Classification of Diseases and Related Health Problems, 10<sup>th</sup> Revision.

## Appendix 2: ATC codes for all medication in the study

| <i>Categories</i>                                      | <b>Name</b>                            | <b>ATC code</b>                             |         |
|--------------------------------------------------------|----------------------------------------|---------------------------------------------|---------|
| <i>Non-steroidal anti-inflammatory drugs (NSAIDs):</i> | Celecoxib                              | M01AH01                                     |         |
|                                                        | Rofecoxib                              | M01AH                                       |         |
|                                                        | Valdecoxib                             | M01AH03                                     |         |
|                                                        | Etoricoxib                             | M01AH05                                     |         |
|                                                        | Lornoxicam                             | M01AC05                                     |         |
|                                                        | Diclofenac                             | M01AB05                                     |         |
|                                                        | Meloxicam                              | M01AC06                                     |         |
| <i>Selective serotonin reuptake inhibitors (SSRIs)</i> | Fluoxetine                             | N06AB03                                     |         |
|                                                        | Citalopram                             | N06AB04                                     |         |
|                                                        | Paroxetine                             | N06AB05                                     |         |
|                                                        | Sertraline                             | N06AB06                                     |         |
|                                                        | Fluvoxamine                            | N06AB08                                     |         |
|                                                        | Escitalopram                           | N06AB10                                     |         |
|                                                        | <i>Antidepressants</i>                 | Non-selective monoamine reuptake inhibitors | N06AA   |
| Non-selective monoamine-oxidase inhibitors             |                                        | N06AF                                       |         |
| Monoamine-oxidase type A inhibitors                    |                                        | N06AG                                       |         |
| Other antidepressants                                  |                                        | N06AX                                       |         |
| <i>Antipsychotics</i>                                  | Antipsychotics                         | N05A-                                       |         |
| <i>Corticosteroids</i>                                 | Systemic hormones                      | H02AB                                       |         |
|                                                        |                                        | H02BX                                       |         |
| <i>Oral anticoagulation therapy</i>                    | Heparin                                | B01AB                                       |         |
|                                                        | Arixtra                                | B01AX                                       |         |
|                                                        | Fibrinolytika                          | A01AD                                       |         |
|                                                        | Vitamin K antagonist                   | B01AA                                       |         |
|                                                        | NOAC                                   | B01AE07                                     |         |
|                                                        | Rivaroxaban                            | B01AF01                                     |         |
|                                                        | Apixaban                               | B01AF02                                     |         |
|                                                        | Edoxaban                               | B01AF03                                     |         |
|                                                        | Trombocytinhibitors                    | B01AC                                       |         |
|                                                        | Aspirin                                | N02BA01                                     |         |
|                                                        | Aspirin                                | N02BA51                                     |         |
|                                                        | <i>Statins</i>                         | Simvastatin                                 | C10AA01 |
|                                                        |                                        | Lovastatin                                  | C10AA02 |
|                                                        |                                        | Fluvastatin                                 | C10AA04 |
| Cerivastatin                                           |                                        | C10AA06                                     |         |
| Atorvastatin                                           |                                        | C10AA05                                     |         |
| Pravastatin                                            |                                        | C10AA03                                     |         |
| Rosuvastatin                                           |                                        | C10AA07                                     |         |
| <i>Antibiotics</i>                                     | Oral treatment of bacterial infections | J01x                                        |         |
|                                                        | viral infections                       | J05x                                        |         |
| <i>Opioids</i>                                         | Morfin                                 | N02AA01                                     |         |
|                                                        | Fentanyl                               | N02AB03                                     |         |
|                                                        | Hydromorphon                           | N02AA03                                     |         |
|                                                        | Ketobemidon (ketogan)                  | N02AG02                                     |         |
|                                                        | Methadon                               | N07BC02                                     |         |
|                                                        | Nicomorphin                            | N02AA04                                     |         |
|                                                        | Oxycodon                               | N02AA05                                     |         |
|                                                        | Pethidin                               | N02AB02                                     |         |
| Targin                                                 | N02AA55                                |                                             |         |

|                                                                |                                         |         |
|----------------------------------------------------------------|-----------------------------------------|---------|
|                                                                | Tramadol                                | N02AX02 |
|                                                                | Tapentadol                              | N02AX06 |
|                                                                | Buprenorphin                            | N02AE01 |
|                                                                | Codein                                  | R05DA04 |
|                                                                | Codein and paracetamol                  | N02AJ06 |
| <i>Hormone replacement therapy</i>                             | Estrogen                                | G03C    |
|                                                                | Estrogen                                | L02AA   |
|                                                                | Progesteron and estrogen in combination | G03F    |
|                                                                | Antiandrogen                            | G03H    |
|                                                                | Progesteron                             | G03D    |
| <i>Anti-osteoporosis medication</i>                            |                                         |         |
| <i>Bisfosfonats</i>                                            | Etidronat                               | M05BA01 |
|                                                                | Clodronate                              | M05BA02 |
|                                                                | Pamidronate                             | M05BA03 |
|                                                                | Alendronat                              | M05BA04 |
|                                                                | Alendronat and colecalciferol           | M05BB03 |
|                                                                | Alendronat, calcium and colecalciferol  | M05BB05 |
|                                                                | Tiludronate                             | M05BA05 |
|                                                                | Ibandronat                              | M05BA06 |
|                                                                | Risedronat                              | M05BA07 |
|                                                                | Risedronat and calcium                  | M05BB02 |
|                                                                | Risedronat, calcium and colecalciferol  | M05BB04 |
|                                                                | Zoledronat                              |         |
| <i>Other drugs affecting bone structure and mineralization</i> | Denosumab                               | M05BX04 |
|                                                                | Strontiumranelat                        | M05BX03 |

ATC codes: Anatomical Therapeutic Chemical Classification System
