# Supplementary material
Source: HighWire-hosted journal article supplement (https://bmjopen.bmj.com/content/11/3/e039238)
Supplement: inline-supplementary-material-4 [file inline-supplementary-material-4.pdf]

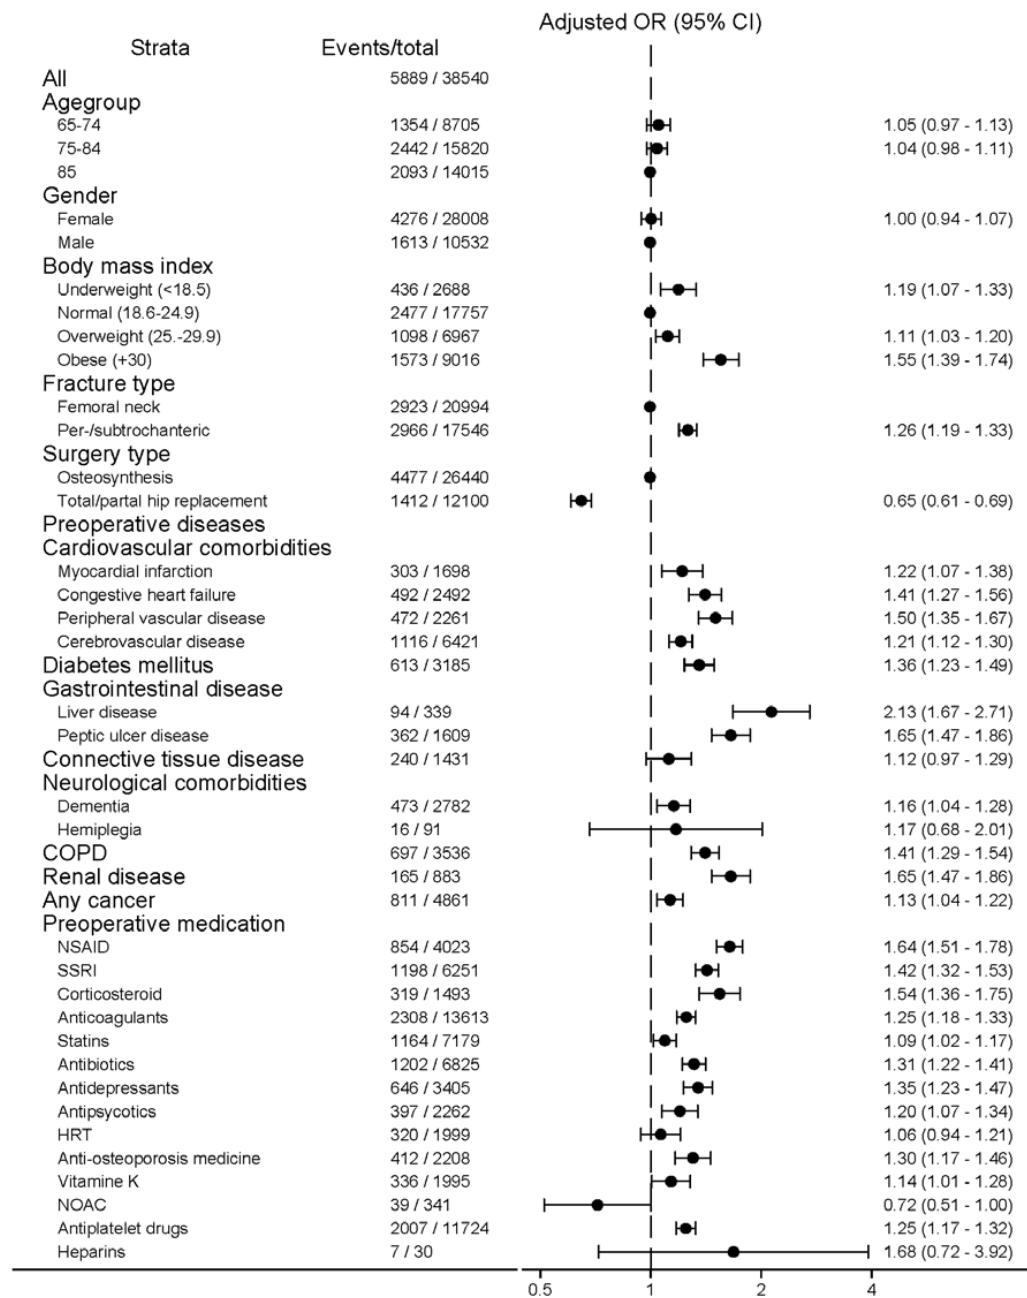

Appendix figure 3: Landmark analyses at 9 months: Risk factors for developing new chronic opioid use after hip fracture surgery among patients with no opioid use before surgery, when excluding the patients who died in the first, second, and third quarter of surgery, odds ratios adjusted for age and sex.

COPD: Chronic pulmonary disease, NSAID: nonsteroidal anti-inflammatory drug, SSRI: selective serotonin reuptake inhibitors, HRT: Hormone Replacement Therapy, NOAC: novel oral anticoagulant. Odds ratios (ORs) with 95% confidence intervals (CI)
